# Supplementary material for: Direct oxidative esterification of alcohols and hydration of nitriles catalyzed by a reusable silver nanoparticle grafted onto mesoporous polymelamine formaldehyde (AgNPs@mPMF)
Source: Royal Society of Chemistry journal article supplement (doi:10.1039/c4cy01278j), 2014-12-02
Supplement: c4cy01278j1.pdf [file c4cy01278j1.pdf]

## Supplementary Information

### **Direct Oxidative Esterification of Alcohols and Hydration of Nitriles Catalyzed By A Reusable Silver Nanoparticle Grafted Mesoporous Polymelamine Formaldehyde (AgNPs@mPMF)**

Kajari Ghosh,<sup>a</sup> Md. Asif Iqbal,<sup>b‡</sup> Rostam Ali Molla,<sup>a‡</sup> Ashutosh Mishra<sup>c</sup>,  
Kamaluddin K,<sup>\*b</sup> S. M. Islam<sup>\*a</sup>

<sup>a</sup>Department of Chemistry, University of Kalyani, Kalyani, Nadia 741235, W.B., India

<sup>b</sup>Department of Chemistry, IIT Roorkee, Roorkee 247667, Uttarakhand, India

<sup>c</sup>School of Physics, Devi Ahilya University, Indore-452017, Madhya Pradesh, India

‡These authors contributed equally to this manuscript

---

#### **Table of contents**

|           |                                                                                        |                |
|-----------|----------------------------------------------------------------------------------------|----------------|
| <b>1.</b> | <b>NMR datas of the substrates for the oxidative esterification reaction</b>           | <b>S2-S4</b>   |
| <b>2.</b> | <b>NMR datas of the substrates for the hydration of nitriles</b>                       | <b>S4-S6</b>   |
| <b>3.</b> | <b>References</b>                                                                      | <b>S7</b>      |
| <b>4.</b> | <b>Powder XRD pattern, FE-SEM, EDX and HR-TEM image of mPMF material.</b>              | <b>S8-S9</b>   |
| <b>5.</b> | <b>Effect of catalyst amount on aerobic oxidative esterification of benzyl alcohol</b> | <b>S10</b>     |
| <b>6.</b> | <b>Characterization of homogeneous Ag NPs</b>                                          | <b>S10-S12</b> |

## 1. NMR datas of the substrates for the oxidative esterification reaction

### Methyl benzoate (Table 3, entry 1)<sup>1</sup>:

<sup>1</sup>H NMR (400 MHz, CDCl<sub>3</sub>, 25 °C) δ = 3.92 (3H, s), 7.42 (2H, t, J = 7.6 Hz), 7.56 (1H, t, J = 8.0 Hz), 8.05 (2H, d, J = 7.6 Hz); <sup>13</sup>C NMR (100 MHz, CDCl<sub>3</sub>, 25 °C) δ = 167.2, 132.8, 130.1, 129.7, 128.4, 52.1.

### Methyl 4-chlorobenzoate (Table 3, entry 2)<sup>2</sup>:

<sup>1</sup>H NMR (400 MHz, CDCl<sub>3</sub>, 25 °C) δ = 3.87 (3H, s), 7.36 (2H, d, J = 8.4 Hz), 7.92 (2H, d, J = 8.0 Hz); <sup>13</sup>C NMR (100 MHz, CDCl<sub>3</sub>, 25 °C) δ = 166.2, 139.3, 130.8, 128.6, 128.5, 52.3.

### Methyl 3-chlorobenzoate (Table 3, entry 3)<sup>3</sup>:

<sup>1</sup>H NMR (400 MHz, CDCl<sub>3</sub>, 25 °C) δ = 3.92 (3H, s), 7.38 (1H, t, J = 8.0 Hz), 7.53 (1H, d, J = 8.0 Hz), 7.92 (1H, d, J = 7.6 Hz), 8.03 (1H, s); <sup>13</sup>C NMR (100 MHz, CDCl<sub>3</sub>, 25 °C) δ = 165.8, 134.7, 133.0, 131.9, 129.7, 127.9, 122.0, 52.6.

### Methyl 2-chlorobenzoate (Table 3, entry 4)<sup>4</sup>:

<sup>1</sup>H NMR (400 MHz, CDCl<sub>3</sub>, 25 °C) δ = 3.92 (3H, s), 7.30-7.32 (1H, m), 7.38-7.45 (2H, m), 7.80-7.82 (1H, m); <sup>13</sup>C NMR (100 MHz, CDCl<sub>3</sub>, 25 °C) δ = 166.2, 133.8, 132.7, 131.5, 131.2, 130.2, 126.7, 52.5.

### Methyl 4-bromobenzoate (Table 3, entry 5)<sup>3</sup>:

<sup>1</sup>H NMR (400 MHz, DMSO-d<sub>6</sub>, 25 °C): δ = 3.84 (3H, s), 7.72 (2H, d, J = 8.8 Hz), 7.86 (2H, d, J = 8.4 Hz); <sup>13</sup>C NMR (100 MHz, DMSO-d<sub>6</sub>, 25 °C): δ = 166.7, 133.0, 132.2, 129.8, 128.4, 51.5.

### Methyl 4-fluorobenzoate (Table 3, entry 6)<sup>5</sup>:

<sup>1</sup>H NMR (300 MHz, CDCl<sub>3</sub>, 25 °C) δ = 3.90 (s, 3H), 7.11 (2H, dd, J<sub>1</sub> = J<sub>2</sub> = 8.7), 8.06 (2H, dd, J<sub>1</sub> = 5.7, J<sub>2</sub> = 8.7); <sup>13</sup>C NMR (75 MHz, CDCl<sub>3</sub>, 25 °C) δ = 166.4, 166.0 (d), 132.3 (d), 126.6, 115.7 (d), 52.4.

### Methyl 4-(trifluoromethyl) benzoate (Table 3 entry 7)<sup>1</sup>:

<sup>1</sup>H NMR (300 MHz, CDCl<sub>3</sub>, 25 °C) δ = 3.95 (3H, s), 7.68 (2H, d, J = 8.1 Hz), 8.15 (2H, d, J = 8.1 Hz); <sup>13</sup>C NMR (75 MHz, CDCl<sub>3</sub>, 25 °C) δ = 166.2, 134.8, 133.6, 130.2, 125.6, 125.6, 52.8.

### Methyl 3-(trifluoromethyl) benzoate (Table 3 entry 8)<sup>1</sup>:

<sup>1</sup>H NMR (300 MHz, CDCl<sub>3</sub>, 25 °C) δ = 3.96 (3H, s), 7.58 (1H, dd, J<sub>1</sub> = J<sub>2</sub> = 7.8 Hz), 7.80 (1H, d, J = 7.8 Hz), 8.23 (1H, d, J = 7.8 Hz), 8.30 (1H, s); <sup>13</sup>C NMR (75 MHz, CDCl<sub>3</sub>, 25 °C) δ = 166.0, 133.6, 133.0, 131.3, 129.8, 129.3, 126.8, 52.8.

**Methyl 4-nitrobenzoate (Table 3 entry 9)<sup>6</sup>:**

<sup>1</sup>H NMR (400 MHz, CDCl<sub>3</sub>, 25 °C) δ = 2.38 (3H, s), 3.88 (3H, s), 7.29-7.36 (2H, m), 7.83-7.86 (2H, m); <sup>13</sup>C NMR (100 MHz, CDCl<sub>3</sub>, 25 °C) δ = 167.2, 143.6, 129.5, 129.0, 127.5, 51.8, 21.8.

**Methyl 3-nitrobenzoate (Table 3 entry 10)<sup>7</sup>:**

<sup>1</sup>H NMR (300 MHz, CDCl<sub>3</sub>, 25 °C) δ = 3.98 (3H, s), 7.61-7.69 (1H, m), 8.35-8.45 (2H, m), 8.82-8.88 (1H, m); <sup>13</sup>C NMR (75 MHz, CDCl<sub>3</sub>, 25 °C) δ = 52.7, 124.5, 127.3, 129.5, 131.8, 135.1, 148.2, 164.8.

**Dimethyl terephthalate (Table 3 entry 11)<sup>1</sup>:**

<sup>1</sup>H NMR (300 MHz, CDCl<sub>3</sub>, 25 °C) δ = 3.95 (6H, s), 8.08 (4H, s); <sup>13</sup>C NMR (75 MHz, CDCl<sub>3</sub>, 25 °C) δ = 166.7, 134.3, 129.8, 52.8.

**Methyl biphenyl-4-carboxylate (Table 3 entry 12)<sup>8</sup>:**

<sup>1</sup>H NMR (300 MHz, CDCl<sub>3</sub>, 25 °C) δ = 3.83 (3H, s), 7.25-7.38 (3H, m), 7.53 (2H, d, *J* = 9.9 Hz), 7.58 (2H, d, *J* = 8.7 Hz), 8.00 (2H, d, *J* = 8.1 Hz); <sup>13</sup>C NMR (75 MHz, CDCl<sub>3</sub>, 25 °C) δ = 167.6, 146.2, 140.6, 131.3, 130.7, 129.4, 128.6, 127.8, 127.6, 52.7.

**Methyl 4-methylbenzoate (Table 3 entry 13)<sup>1</sup>:**

<sup>1</sup>H NMR (400 MHz, CDCl<sub>3</sub>, 25 °C) δ = 2.39 (3H, s), 3.88 (3H, s), 7.29-7.36 (2H, m), 7.83-7.86 (2H, m); <sup>13</sup>C NMR (100 MHz, CDCl<sub>3</sub>) δ ppm: 167.1, 143.5, 129.6, 129.0, 127.4, 51.8, 21.6.

**Methyl 3-methylbenzoate (Table 3 entry 14)<sup>1</sup>:**

<sup>1</sup>H NMR (400 MHz, CDCl<sub>3</sub>, 25 °C) δ = 2.39 (3H, s), 3.88 (3H, s), 7.29-7.36 (2H, m), 7.83-7.86 (2H, m); <sup>13</sup>C NMR (100 MHz, CDCl<sub>3</sub>, 25 °C) δ = 167.3, 138.2, 133.7, 130.2, 128.3, 126.8, 52.0, 21.3.

**Methyl 2-methylbenzoate (Table 3 entry 15)<sup>9</sup>:**

<sup>1</sup>H NMR (400 MHz, CDCl<sub>3</sub>, 25 °C) δ = 2.60 (3H, s), 3.89 (3H, s), 7.22-7.25 (2H, m), 7.36-7.40 (1H, m), 7.89-7.91 (1H, m); <sup>13</sup>C NMR (100 MHz, CDCl<sub>3</sub>, 25 °C) δ = 168.2, 140.3, 132.0, 131.8, 130.7, 129.7, 125.8, 51.9, 21.8.

**Methyl 3,4-dimethylbenzoate (Table 3 entry 16)<sup>10</sup>:**

<sup>1</sup>H NMR (400 MHz, CDCl<sub>3</sub>, 25 °C) δ = 2.28 (6H, s), 3.88 (3H, s), 7.17 (1H, d, *J* = 8.0 Hz), 7.75 (1H, d, *J* = 8.8 Hz), 7.80 (3H, s); <sup>13</sup>C NMR (100 MHz, CDCl<sub>3</sub>, 25 °C) δ = 167.8, 142.8, 137.3, 131.3, 130.3, 128.2, 127.8, 52.3, 20.6, 20.3.

**Methyl 4-methoxybenzoate (Table 3 entry 17)<sup>1</sup>:**

<sup>1</sup>H NMR (400 MHz, CDCl<sub>3</sub>, 25 °C) δ = 3.86 (3H, s), 3.89 (3H, s), 6.92 (2H, d, *J* = 8.8 Hz), 7.98 (2H, d, *J* = 8.8 Hz); <sup>13</sup>C NMR (100 MHz, CDCl<sub>3</sub>, 25 °C) δ = 166.8, 163.5, 131.7, 122.7, 113.7, 55.5, 51.8.

**Methyl 3-methoxybenzoate (Table 3 entry 18)<sup>1</sup>:**

<sup>1</sup>H NMR (400 MHz, DMSO-d<sub>6</sub>, 25 °C): δ = 3.78 (3H, s), 3.82 (3H, s), 7.17-7.20 (1H, m), 7.37-7.41 (2H, m), 7.52 (d, J = 7.6 Hz, 1H); <sup>13</sup>C NMR (100 MHz, DMSO-d<sub>6</sub>, 25 °C): δ = 166.2, 159.4, 131.1, 129.8, 121.5, 119.4, 113.9, 55.4, 52.3.

**Methyl 3,4-dimethoxybenzoate (Table 3 entry 19)<sup>11</sup>:**

<sup>1</sup>H NMR (400 MHz, CDCl<sub>3</sub>, 25 °C) δ = 3.89 (3H, s), 3.93 (6H, s), 6.89 (1H, d, J = 8.4 Hz), 7.54 (1H, d, J = 1.6), 7.68 (1H, dd, J<sub>1</sub> = J<sub>2</sub> = 1.6 Hz); <sup>13</sup>C NMR (100 MHz, CDCl<sub>3</sub>, 25 °C) δ = 167.5, 153.6, 149.3, 124.2, 123.3, 112.6, 110.9, 56.7, 52.7.

**Methyl 3,4,5-trimethoxybenzoate (Table 3 entry 20)<sup>6</sup>:**

<sup>1</sup>H NMR (400 MHz, CDCl<sub>3</sub>, 25 °C) δ = 3.88 (12H, s), 7.28 (2H, s); <sup>13</sup>C NMR (100 MHz, CDCl<sub>3</sub>, 25 °C) δ = 166.9, 153.1, 142.3, 125.3, 106.9, 103.2, 61.1, 56.4, 52.4.

**Methyl 1-naphthoate (Table 3 entry 21)<sup>3</sup>:**

<sup>1</sup>H NMR (400 MHz, CDCl<sub>3</sub>, 25 °C) δ = 4.02 (1H, s), 7.48-7.56 (m, 1H), 7.60-7.64 (1H, m), 7.88 (1H, d, J = 8.4 Hz), 8.03 (1H, d, J = 8.4 Hz), 8.20 (1H, d, J = 7.2 Hz), 8.93 (1H, d, J = 8.4 Hz); <sup>13</sup>C NMR (100 MHz, CDCl<sub>3</sub>, 25 °C) δ = 168.2, 133.8, 133.5, 131.5, 130.4, 128.7, 127.9, 127.3, 126.4, 125.8, 124.7, 52.3.

**Methyl furan-2-carboxylate (Table 3 entry 22)<sup>1</sup>:**

<sup>1</sup>H NMR (300 MHz, CDCl<sub>3</sub>, 25 °C) δ = 3.8 (3H, s), 6.48 (1H, dd, J<sub>1</sub> = 1.8 Hz, J<sub>2</sub> = 3.3 Hz), 7.16 (1H, d, J = 3.3 Hz), 7.55 (1H, d, J = 0.6 Hz); <sup>13</sup>C NMR (75 MHz, CDCl<sub>3</sub>, 25 °C) δ = 159.5, 146.6, 144.9, 118.3, 112.2, 52.2.

**Methyl thiophene-2-carboxylate (Table 3 entry 23)<sup>1</sup>:**

<sup>1</sup>H NMR (300 MHz, CDCl<sub>3</sub>, 25 °C) δ = 3.88 (3H, s), 7.09 (1H, dd, J<sub>1</sub> = 3.9 Hz, J<sub>2</sub> = 4.5 Hz), 7.54 (1H, d, J = 4.5 Hz), 7.80 (1H, d, J = 3.0 Hz); <sup>13</sup>C NMR (75 MHz, CDCl<sub>3</sub>, 25 °C) δ = 163.2, 134.2, 134.0, 132.8, 128.2, 52.5.

**2. NMR datas of the substrates for the hydration of nitriles****Benzamide (Table 4, entry 1)<sup>12</sup>:**

<sup>1</sup>H NMR (400MHz, DMSO-d<sub>6</sub>, 25 °C): δ = 7.84 (2H, m), 7.48 (3H, m), 5.86 (2H, br. s). <sup>13</sup>C NMR (100MHz, DMSO-d<sub>6</sub>, 25 °C): δ = 168.8, 134.2, 131.2, 128.2, 127.5.

**4-Chlorobenzamide (Table 4, entry 2)<sup>13</sup>:**

<sup>1</sup>H NMR (300MHz, DMSO-d<sub>6</sub>, 25 °C) δ = 8.09 (1H, s), 7.91-7.95 (2H, m), 7.55-7.59 (2H, m); <sup>13</sup>C NMR (75MHz, DMSO-d<sub>6</sub>, 25 °C): δ = 167.7, 137.2, 134.0, 130.5, 129.3.

**3-Chlorobenzamide (Table 4, entry 3)<sup>13</sup>:**

<sup>1</sup>H NMR (300MHz, DMSO-d<sub>6</sub>, 25 °C) δ = 8.12 (1H, s), 7.94-7.96 (1H, m), 7.85-7.89 (1H, m), 7.60-7.64 (1H, m), 7.58 (1H, s), 7.50-7.55 (1H, m). <sup>13</sup>C NMR (75MHz, DMSO-d<sub>6</sub>, 25 °C): δ = 167.4, 137.2, 134.0, 132.0, 131.2, 128.2, 127.0.

**2-Chlorobenzamide (Table 4, entry 4)<sup>13</sup>:**

<sup>1</sup>H NMR (300MHz, DMSO-d<sub>6</sub>, 25 °C) δ = 8.14-6.84 (6H, m). <sup>13</sup>C NMR (75MHz, DMSO-d<sub>6</sub>, 25 °C): δ = 169.4, 138.0, 130.8, 130.5, 129.7, 127.9.

**4-Bromobenzamide (Table 4, entry 5)<sup>12</sup>:**

<sup>1</sup>H NMR ((400 MHz, DMSO-d<sub>6</sub>, 25 °C) δ = 7.66 (2H, m), 7.57 (2H, m), 5.88 (2H, br. s). <sup>13</sup>C NMR (100MHz, DMSO-d<sub>6</sub>, 25 °C): δ = 165.2, 135.4, 132.0, 131.1, 126.6.

**4-Fluorobenzamide (Table 4, entry 6)<sup>13</sup>:**

<sup>1</sup>H NMR (300MHz, DMSO-d<sub>6</sub>, 25 °C) δ = 8.04 (1H, s), 7.96-8.00 (2H, m), 7.43 (1H, s), 7.29-7.35 (2H, m); <sup>13</sup>C NMR (75 MHz, DMSO-d<sub>6</sub>, 25 °C): δ = 167.7, 164.8, 131.7, 130.9, 115.8.

**3-Fluorobenzamide (Table 4, entry 7)<sup>13</sup>:**

<sup>1</sup>H NMR (300MHz, DMSO-d<sub>6</sub>, 25 °C) δ = 8.10 (1H, s), 7.74-7.77 (1H, m), 7.67-7.71 (1H, m), 7.51-7.57 (2H, m), 7.38-7.42 (1H, m). <sup>13</sup>C NMR (75 MHz, DMSO-d<sub>6</sub>, 25 °C): δ = 166.5, 162.0, 136.8, 130.4, 123.8, 118.1.

**4-Nitrobenzamide (Table 4, entry 8)<sup>12</sup>:**

<sup>1</sup>H NMR (400 MHz, DMSO-d<sub>6</sub>, 25 °C): δ = 8.37-8.21 (3H, m), 8.11 (2H, d), 7.73 (1H, br. s). <sup>13</sup>C NMR (100 MHz, DMSO-d<sub>6</sub>, 25 °C): δ = 166.3, 149.1, 140.0, 128.9, 123.9.

**2-Nitrobenzamide (Table 4, entry 9)<sup>14</sup>:**

<sup>1</sup>H NMR (300MHz, CDCl<sub>3</sub>, 25 °C): δ = 8.10–8.00 (1H, m), 7.73–7.55 (3H, m), 5.84 (2H, s, br); <sup>13</sup>C NMR (75MHz, CDCl<sub>3</sub>, 25 °C): δ = 133.6, 131.0, 130.9, 129.0, 128.8, 124.7.

**4-(Trifluoromethyl)benzamide (Table 4, entry 10)<sup>13</sup>:**

<sup>1</sup>H NMR (300MHz, DMSO-d<sub>6</sub>, 25 °C): δ = 8.26 (1H, s), 8.10-8.13 (2H, m), 7.85-7.89 (2H, m), 7.69 (1H, s); <sup>13</sup>C NMR (75MHz, DMSO-d<sub>6</sub>, 25 °C): δ = 167.6, 139.1, 132.2, 129.4, 126.4, 124.7.

**4-Methoxybenzamide (Table 4, entry 11)<sup>12</sup>:**

<sup>1</sup>H NMR (400 MHz, DMSO-d<sub>6</sub>, 25 °C): δ = 7.73 (2H, d), 7.23 (2H, d), 5.93 (2H, br. s), 3.73 (3H, s); <sup>13</sup>C NMR (100 MHz, DMSO-d<sub>6</sub>, 25 °C): δ = 166.0, 145.0, 133.9, 129.6, 129.5, 54.2.

**3, 4-Dimethoxybenzamide (Table 4, entry 12)<sup>13</sup>:**

<sup>1</sup>H NMR (300 MHz, DMSO-d<sub>6</sub>, 25 °C): δ = 7.91 (1H, s), 7.47-7.56 (2H, m), 7.23 (1H, s), 6.99-7.05 (2H, m), 3.84 (3H, s) 3.82 (3H, s). <sup>13</sup>C NMR (75 MHz, DMSO-d<sub>6</sub>, 25 °C): δ = 164.9, 152.3, 149.1, 127.7, 121.6, 111.7, 56.4, 56.2.

**4-Thiomethylbenzamide (Table 4, entry 13)<sup>13</sup>:**

<sup>1</sup>H NMR (300 MHz, DMSO-d<sub>6</sub>, 25 °C): δ = 8.26 (1H, s), 8.11-8.17 (2H, m), 8.01-8.09 (2H, m), 7.70 (1H, s) 3.32 (3H, s). <sup>13</sup>C NMR (75 MHz, DMSO-d<sub>6</sub>, 25 °C): δ = 169.5, 143.9, 139.8, 129.7, 127.5, 44.2.

**4-Methylbenzamide (Table 4, entry 14)<sup>12</sup>:**

<sup>1</sup>H NMR (400 MHz, DMSO-d<sub>6</sub>, 25 °C): δ = 7.74 (2H, d), 7.23 (2H, d), 5.94 (2H, br. s), 2.38 (3H, s); <sup>13</sup>C NMR (100 MHz, DMSO-d<sub>6</sub>, 25 °C): δ = 166.1, 145.1, 134.0, 129.6, 129.5, 21.3.

**2-Methylbenzamide (Table 4, entry 15)<sup>13</sup>:**

<sup>1</sup>H NMR (400 MHz, DMSO-d<sub>6</sub>, 25 °C): δ = 8.33-8.45 (2H, m), 7.64-7.65 (2H, m), 7.33-7.53 (2H, m), 2.67 (3H, s); <sup>13</sup>C NMR (100 MHz, DMSO-d<sub>6</sub>, 25 °C): δ = 169.7, 135.8, 133.6, 132.2, 131.7, 131.5, 126.6, 22.2.

**3-Methylbenzamide (Table 4, entry 16)<sup>13</sup>:**

<sup>1</sup>H NMR (400 MHz, DMSO-d<sub>6</sub>, 25 °C): δ = 8.01-8.05 (1H, m), 7.95 (1H, s), 7.67-7.73 (2H, m), 7.32-7.39 (2H, m), 2.36 (3H, s). <sup>13</sup>C NMR (100 MHz, DMSO-d<sub>6</sub>): δ = 169.7, 135.7, 133.6, 132.3, 131.7, 131.5, 126.6, 22.2.

**Pyridine-3-carboxamide (Table 4, entry 17)<sup>13</sup>:**

<sup>1</sup>H NMR (400 MHz, DMSO-d<sub>6</sub>, 25 °C): δ = 8.72-8.77 (2H, m), 8.24-8.30 (2H, m), 7.69 (1H, s), 7.48-7.53 (1H, m); <sup>13</sup>C NMR (100 MHz, DMSO-d<sub>6</sub>, 25 °C): δ = 167.5, 152.9, 149.7, 136.2, 130.7, 124.5.

**Pyridine-4-carboxamide (Table 4, entry 18)<sup>13</sup>:**

<sup>1</sup>H NMR (400 MHz, DMSO-d<sub>6</sub>, 25 °C): δ = 8.43 (2H, d), 7.93 (2H, d), 5.95 (2H, br. s); <sup>13</sup>C NMR (100 MHz, DMSO-d<sub>6</sub>, 25 °C): δ = 171.2, 151.0, 122.1.

**Pyridine-2-carboxamide (Table 4, entry 19)<sup>13</sup>:**

<sup>1</sup>H NMR (400 MHz, DMSO-d<sub>6</sub>, 25 °C): δ = 8.79 (1H, d), 8.01 (1H, t), 7.89 (1H, t), 7.67 (1H, d), 5.96 (2H, br. s); <sup>13</sup>C NMR (100 MHz, DMSO-d<sub>6</sub>, 25 °C): δ = 166.0, 150.3, 148.4, 137.6, 126.4, 121.9.

**2-Furamide (Table 4, entry 20)<sup>14</sup>:**

<sup>1</sup>H NMR (300MHz, CDCl<sub>3</sub>, 25 °C): δ = 7.49–7.44 (1H, m), 7.14 (1H, d), 6.50 (1H, dd), 6.37 (2H, s, br); <sup>13</sup>C NMR (75MHz, CDCl<sub>3</sub>, 25 °C): δ = 160.5, 147.7, 144.4, 115.0, 112.2.

**Thiophene-2-carboxamide (Table 4, entry 21)<sup>12</sup>:**

<sup>1</sup>H NMR (400 MHz, DMSO-d<sub>6</sub>, 25 °C): δ = 7.12 (1H, t), 7.35 (1H, br. s), 7.73 (2H, m), 7.93 (1H, br. s, NH); <sup>13</sup>C-NMR (100 MHz, DMSO-d<sub>6</sub>, 25 °C): δ = 163.2, 143.4, 137.8, 136.7, 128.6.

**3-Methyl thiophene-2-carboxamide (Table 2, entry 22)<sup>12</sup>:**

<sup>1</sup>H NMR (400 MHz, DMSO-d<sub>6</sub>, 25 °C): δ = 7.36 (1H, d), 7.03 (1H, d), 5.95 (2H, br. s), 2.37 (3H, s). <sup>13</sup>C NMR (100 MHz, DMSO-d<sub>6</sub>, 25 °C): δ = 164.6, 144.3, 138.8, 137.7, 129.9, 13.6.

**Indole-3-carboxamide (Table 4, entry 23)<sup>11</sup>:**

<sup>1</sup>H NMR (400 MHz, DMSO-d<sub>6</sub>, 25 °C): δ = 9.94 (1H, s), 8.19 (1H, d), 8.08 (1H, m), 7.51 (1H, d), 7.25 (2H, m), 5.99 (2H, br. s, NH<sub>2</sub>). <sup>13</sup>C NMR (100 MHz, DMSO-d<sub>6</sub>, 25 °C): δ = 167.3, 138.4, 137.3, 124.1, 123.4, 122.1, 120.8, 118.2, 112.1.

**2-Naphthamide (Table 4, entry 24)<sup>13</sup>:**

<sup>1</sup>H NMR (300 MHz, DMSO-d<sub>6</sub>, 25 °C): δ = 8.65 (1H, s), 8.13-8.17 (1H, m), 7.77-8.02 (4H, m), 7.60-7.77 (3H, m). <sup>13</sup>C NMR (100 MHz, DMSO-d<sub>6</sub>, 25 °C): δ = 169.3, 135.0, 132.6, 130.5, 129.0, 128.6, 128.1, 127.9, 127.8, 126.9, 123.7.

**Acetamide (Table 4, entry 25)<sup>13</sup>:**

<sup>1</sup>H NMR (300 MHz, DMSO-d<sub>6</sub>, 25 °C): δ = 7.32 (1H, s), 6.72 (1H, s), 1.79 (3H, s); <sup>13</sup>C NMR (100 MHz, DMSO-d<sub>6</sub>, 25 °C): δ = 160.7, 23.5.

**Propionamide (Table 4, entry 26)<sup>15</sup>:**

<sup>1</sup>H NMR (300 MHz, CDCl<sub>3</sub>, 25 °C): δ = 2.18-2.26 (2H, q), 1.12-1.17 (3H, t); <sup>13</sup>C NMR (75 MHz, CDCl<sub>3</sub>, 25 °C): δ = 180.55, 30.08, 10.83.

**References**

|      |                                                                                                                                   |
|------|-----------------------------------------------------------------------------------------------------------------------------------|
| (1)  | C. Liu, J. Wang, L. Meng, Y. Deng, Y. Li, and A. Lei, <i>Angew. Chem. Int. Ed.</i> , 2011, <b>50</b> , 5144-5148.                 |
| (2)  | N. Yamamoto, Y. Obora and Y. Ishii, <i>J. Org. Chem.</i> 2011, <b>76</b> , 2937-2941.                                             |
| (3)  | S. De Sarkar, S. Grimme and A. Studer, <i>J. Am. Chem. Soc.</i> , 2010, <b>132</b> , 1190-1191.                                   |
| (4)  | L. Kaganovsky, D. Gelman and K. Rueck-Braun, <i>J. Organomet. Chem.</i> , 2010, <b>695</b> , 260-266.                             |
| (5)  | J. G. Avila-Zárraga and R. Martínez, <i>Synth. Commun.</i> , 2001, <b>31</b> , 2177-2183.                                         |
| (6)  | L. Wang, J. Li, W. Dai, Y. Lv, Y Zhanga and S. Gao, <i>Green Chem.</i> , 2014, <b>16</b> , 2164-2173.                             |
| (7)  | I. N. C. Kiran, K. Lalwani and A. Sudalai, <i>RSC Adv.</i> , 2013, <b>3</b> , 1695-1698.                                          |
| (8)  | S. Riggleman and P. DeShong, <i>J. Org. Chem.</i> 2003, <b>68</b> , 8106-8109.                                                    |
| (9)  | J. Liu, H. Wang, H. Zhang, X. Wu, H. Zhang, Y. Deng, Z. Yang and A. Lei, <i>Chem. Eur. J.</i> , 2009, <b>15</b> , 4437-4445.      |
| (10) | R. Nakamura, Y. Obora and Y. Ishii, <i>Adv. Synth. Catal.</i> , 2009, <b>351</b> , 1677-1684.                                     |
| (11) | Y. Yamamoto, <i>Adv. Synth. Catal.</i> , 2010, <b>352</b> , 478-492.                                                              |
| (12) | R. N. Prabhu and R. Ramesh, <i>RSC Adv</i> , 2012, <b>2</b> , 4515-4524.                                                          |
| (13) | X-F Wu, M. Sharif, J-B Feng, H. Neumann, A P-Davtyan, P. Langerb and M. Beller, <i>Green Chem.</i> , 2013, <b>15</b> , 1956-1961. |
| (14) | C. Tao, F. Liu, Y. Zhu, W. Liu and Z. Cao, <i>Org. Biomol. Chem.</i> , 2013, <b>11</b> , 3349-3354.                               |
| (15) | S. Kumar and P. Das, <i>New J. Chem.</i> , 2013, <b>37</b> , 2987-2990.                                                           |

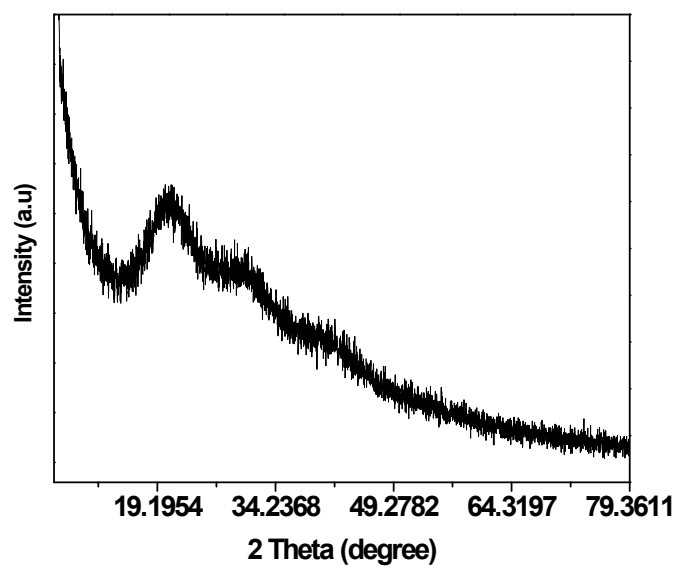

**Figure S1.** Powder XRD pattern of mPMF material.

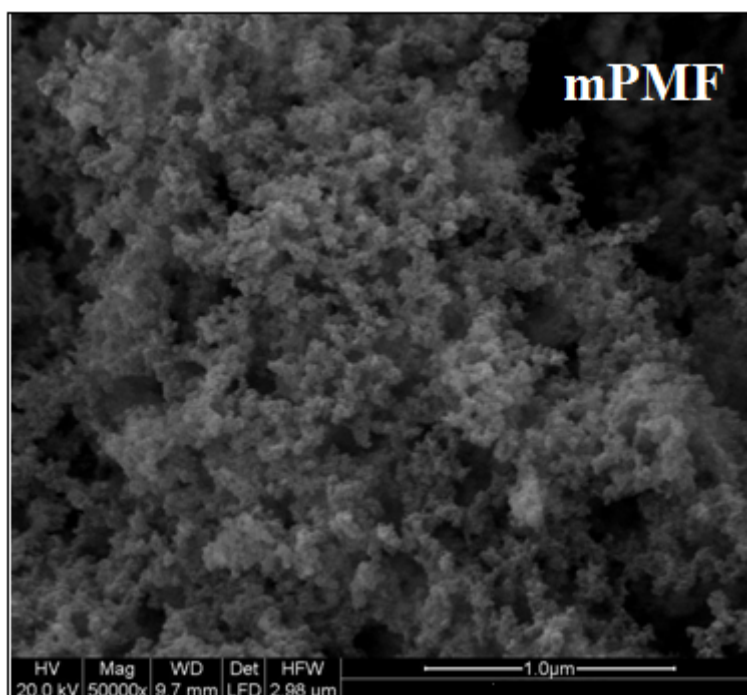

**Figure S2.** FE-SEM image of mPMF material



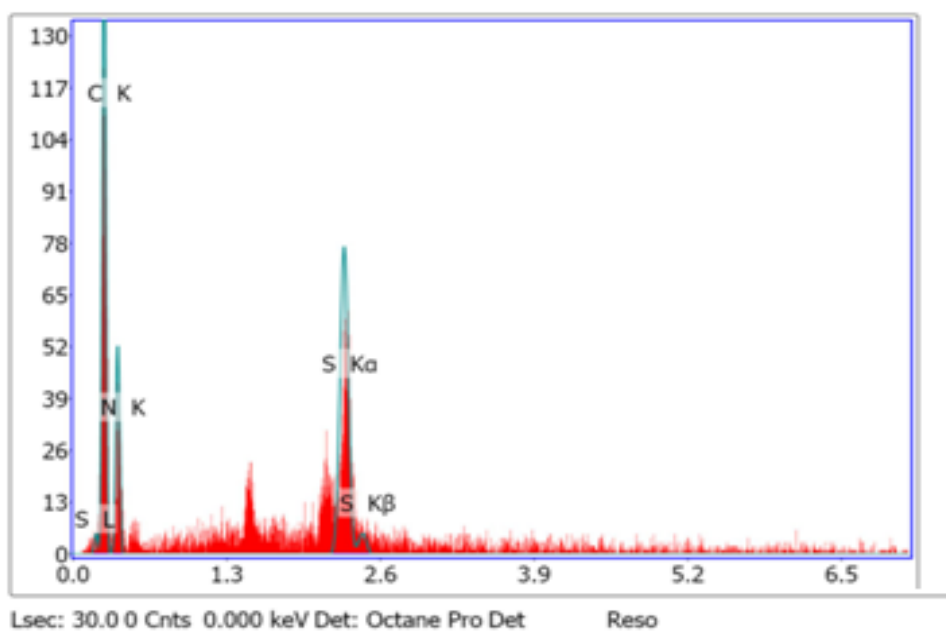

**Figure S3.** EDX image of mPMF material

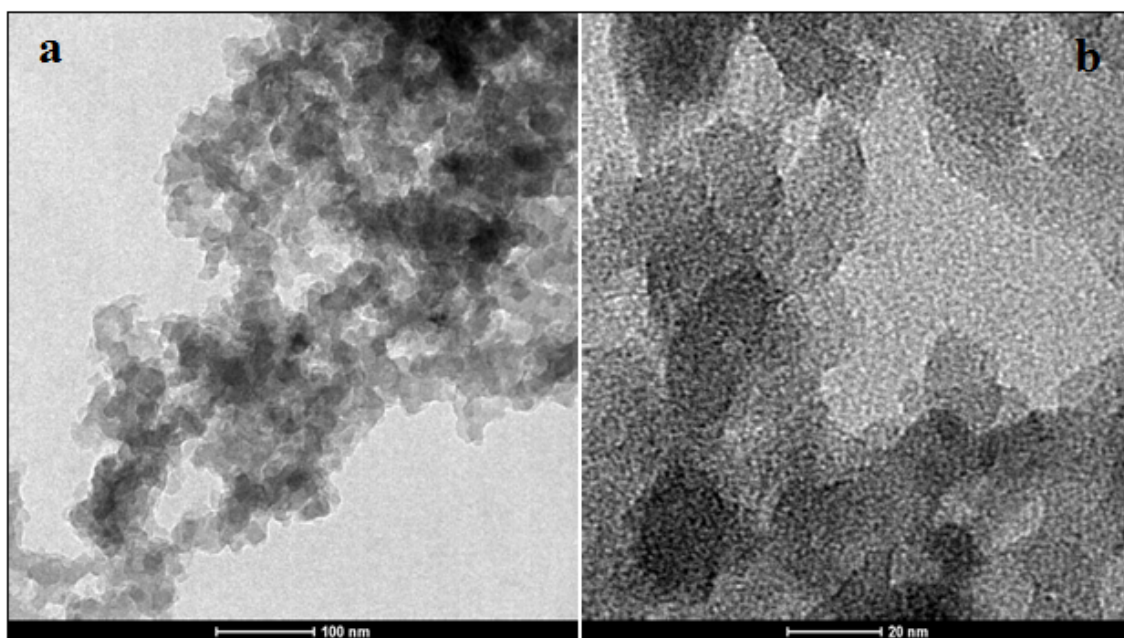

**Figure S4.** HR-TEM images of mPMF material

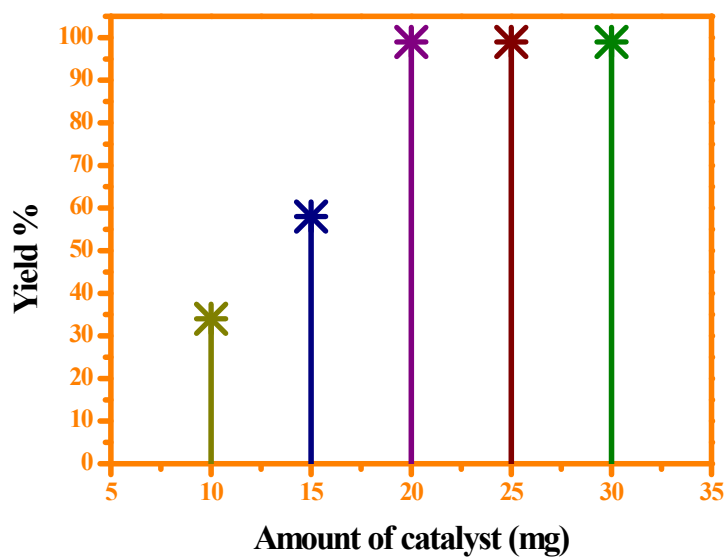

**Figure S5.** Effect of catalyst amount on aerobic oxidative esterification of benzyl alcohol

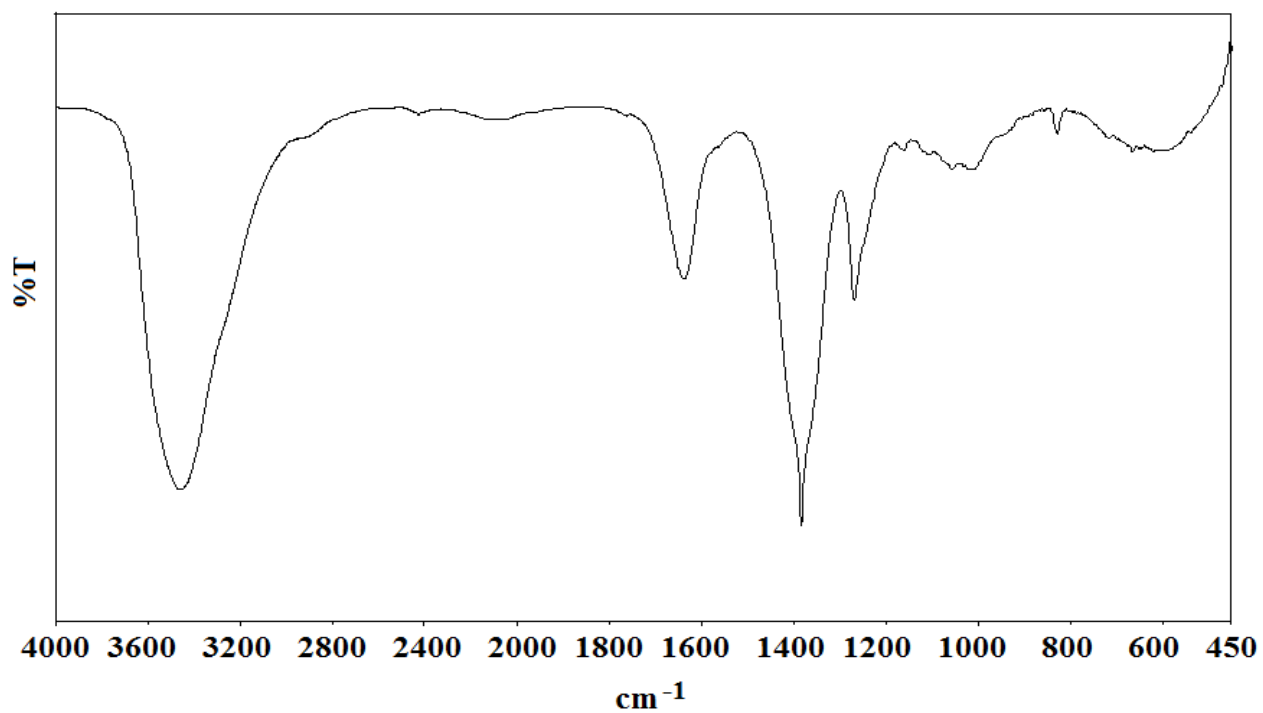

**Figure S6.** FT-IR spectra of homogeneous Ag NPs

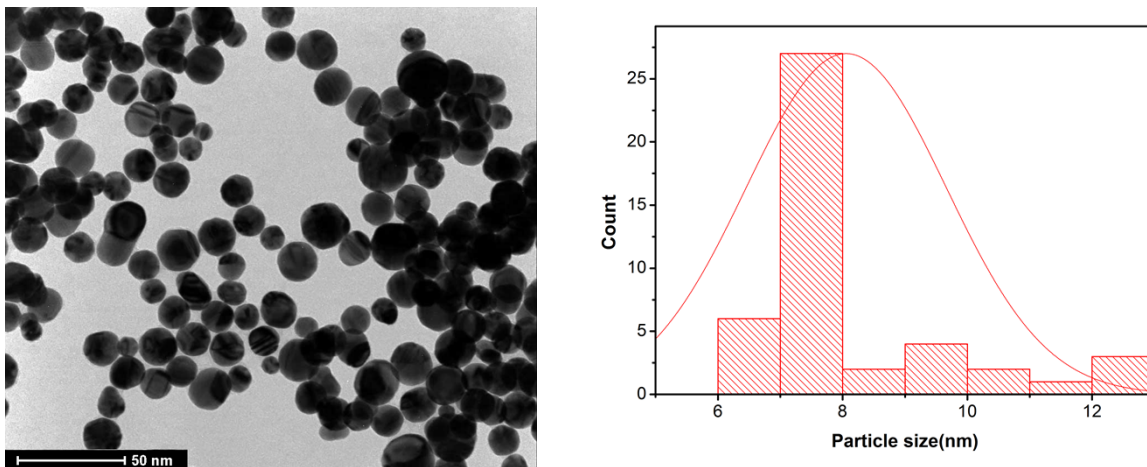

**Figure S7.** TEM image and distribution plot of homogeneous Ag NPs

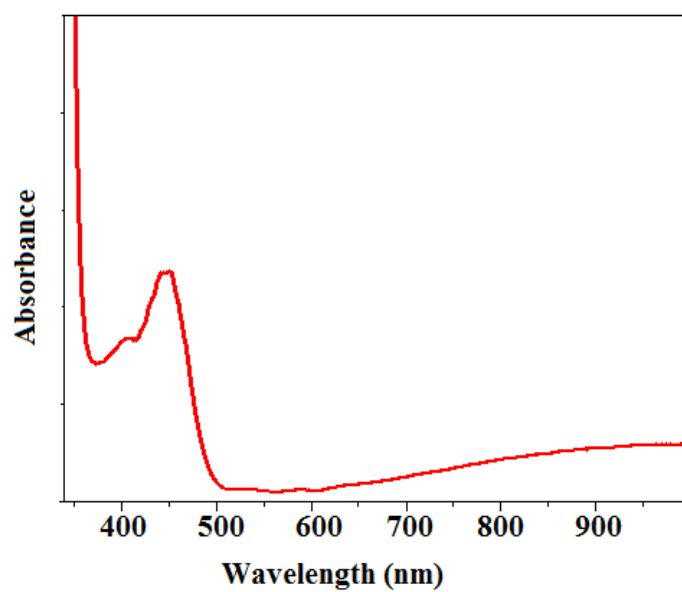

**Figure S8.** Uv-vis spectra of homogeneous Ag NPs

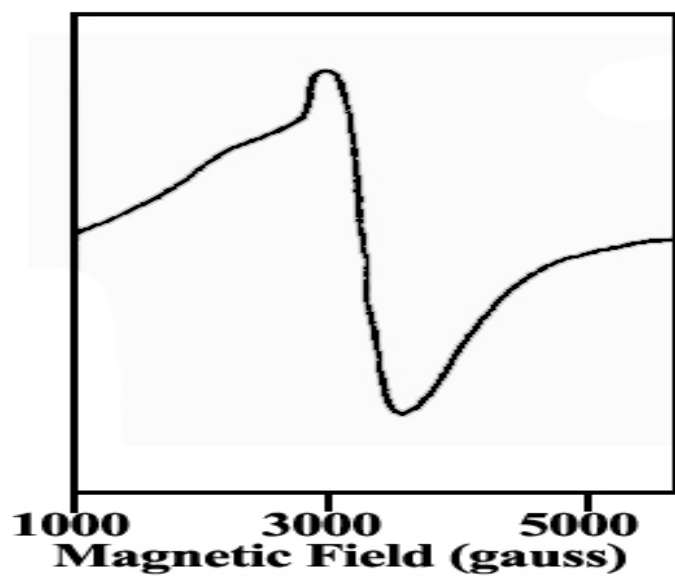

**Figure S9.** EPR spectrum of homogeneous Ag NPs
